# Supplementary material for: ZnO nanorod arrays for various low-bandgap polymers in inverted organic solar cells
Source: Royal Society of Chemistry journal article supplement (doi:10.1039/c3nr04418a), 2013-10-09
Supplement: c3nr04418a.pdf [file c3nr04418a.pdf]

## Supplementary Information

### ZnO Nanorod Arrays for Various Low-bandgap Polymers in Inverted Organic Solar Cells

Ping-Yi Ho<sup>†</sup>, Subramani Thiyaagu<sup>†</sup>, Shao-Hsuan Kao<sup>†</sup>, Chia-Yu Kao<sup>†</sup> and Ching-Fuh Lin<sup>†\*</sup>

<sup>†</sup>Graduate Institute of Photonics and Optoelectronics, National Taiwan University, No. 1, Sec. 4, Roosevelt Road, Taipei 10617, Taiwan, ROC.

<sup>‡</sup>Graduate Institute of Electronics Engineering, National Taiwan University, No. 1, Sec. 4, Roosevelt Road, Taipei 10617, Taiwan, ROC.

\* Corresponding author. Address: Institute of Photonics and Optoelectronics, National Taiwan University, Taipei, 10617 Taiwan, Republic of China.; Tel: +886-2-33663540; Fax: +886-2-23642603; E-mail address: cflin@cc.ee.ntu.edu.tw

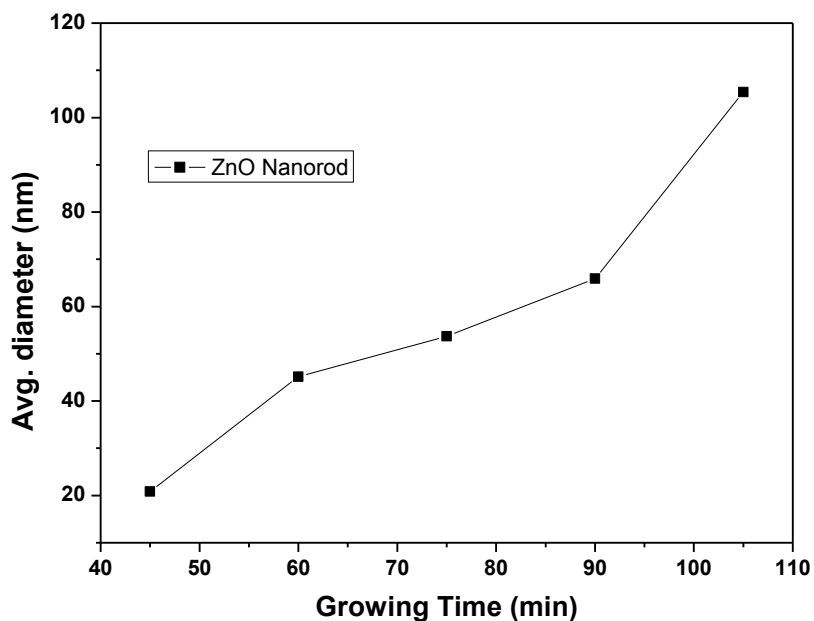

**Fig. S1.** ZnO Nanorod diameter with respect to growing time

**Table. S1.** ZnO Nanorod diameter and coverage with respect to growing time

| ZnO Nanorods growing time | 45 min | 60 min | 75 min | 90 min | 105 min |
|---------------------------|--------|--------|--------|--------|---------|
| Diameter                  | 20.8   | 45.1   | 53.6   | 65.9   | 105.3   |
| Coverage                  | 67%    | 76%    | 81%    | 87%    | 94%     |

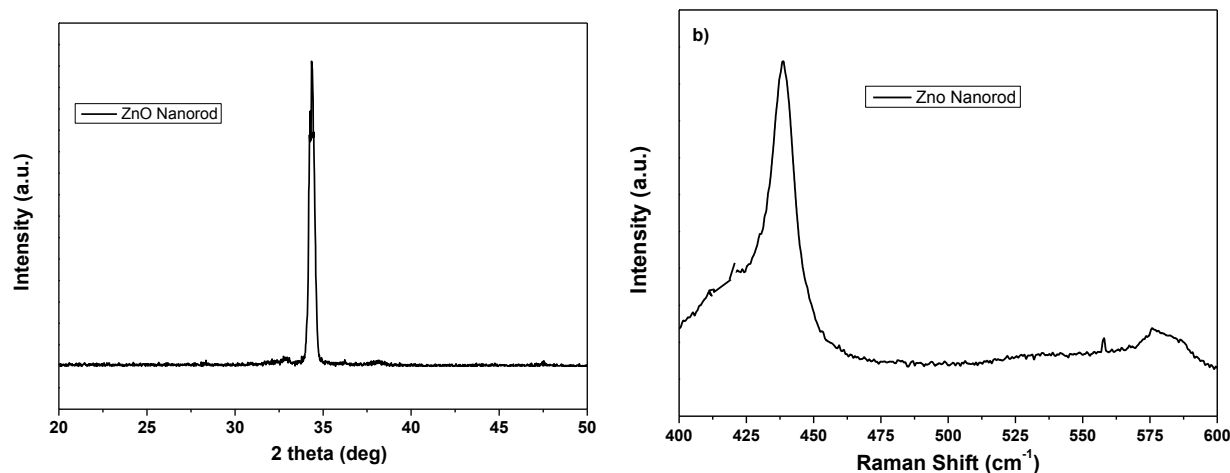

**Fig. S2.** (a) XRD intensity of ZnO Nanorod (b) Raman intensity of ZnO Nanorods

Figure S2 showed that XRD pattern and raman scattering spectrum of ZnO nanorods. In Figure S2(a) the only peak appears in about  $34.5^\circ$  and the Full Width of Half Maximum (FWHM) is  $0.309^\circ$ . By the above information, we could discover that the ZnO Nanorods were highly c-oriented. In Figure S2(b) only two peak which appeared in  $438\text{ cm}^{-1}$  and  $575\text{ cm}^{-1}$  were E2(h) and A1(LO) of ZnO Raman Scattering spectrum. For highly c-oriented ZnO systems, these two peaks are the allowed modes in Raman Scattering spectrums. The sharp E2(h) peak with Full Width of Half Maximum (FWHM)  $10\text{ cm}^{-1}$  also showed the satisfactory crystallinity of ZnO Nanorods.
